# Supplementary material
Source: PubMed Central journal article supplement (PMC10443569)

Figure S1

A

## Clinical and demographical data of study participants

| Participant | Gender | Age of death | Duration of HIV-1 infection (yr) from diagnosis date | Time on HAART (yr) | HAART regimen | CD4 count before death (cells/ul) | Viral load before death (copies/ml) |
|-------------|--------|--------------|------------------------------------------------------|--------------------|---------------|-----------------------------------|-------------------------------------|
| 1           | Female | 38           | 16                                                   | 16                 | FTC, RPV, TAF | 1625                              | Undetectable                        |
| 2           | Male   | 68           | 25                                                   | 1                  | FTC, TAF, BIC | 165                               | Undetectable                        |
| 3           | Male   | 52           | 1                                                    | 1                  | BIC, FTC, TAF | 145                               | 136                                 |

B

## Cell numbers analyzed from each tissue of each study participant

|                   | Compartment                  | Participant 1 (million cells) | Participant 2 (million cells) | Participant 3 (million cells) |
|-------------------|------------------------------|-------------------------------|-------------------------------|-------------------------------|
| Brain tissues     | Basal ganglia                | 67.25                         | 18.06                         | 32.85                         |
|                   | Thalamus                     | 35.81                         | 5.77                          | 21.83                         |
|                   | Occipital lobe               | 87.17                         | 29.07                         | 43.65                         |
|                   | Frontal lobe                 | 64.29                         | 13.39                         | 64.91                         |
|                   | Periventricular white matter |                               |                               | 36.42                         |
| Non-brain tissues | Lymph nodes                  | 28.86                         | 15.57                         |                               |
|                   | Spleen                       | 63.69                         | 104.15                        |                               |
|                   | Colon                        | 54.02                         | 17.74                         |                               |
|                   | Liver                        | 72.91                         | 43.59                         |                               |
|                   | Pancreas                     | 91.36                         | 65.1                          |                               |
|                   | Terminal ileum               |                               | 1.46                          |                               |
|                   | Kidney                       | 57.02                         | 25.9                          |                               |
|                   | Ovary                        | 51.96                         |                               |                               |
|                   | Uterus                       | 79.11                         |                               |                               |
|                   | Testes                       |                               | 4.74                          |                               |
|                   | Prostate                     |                               | 19.5                          |                               |
|                   | Thyroid                      | 53.65                         | 46.63                         |                               |
|                   | Adrenal                      | 39.43                         | 14.87                         |                               |
|                   | Total                        | 846.53                        | 425.54                        | 199.66                        |

Figure S2

A

The ratio of intact to defective proviral sequences

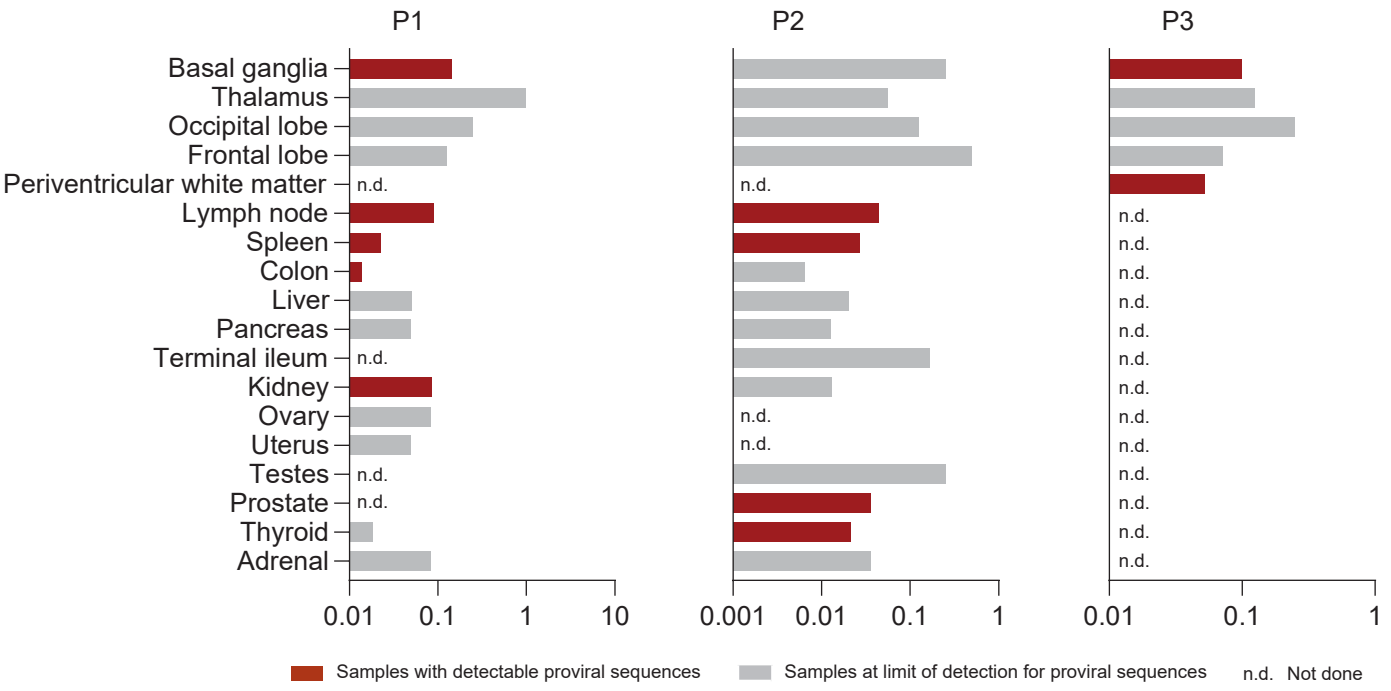

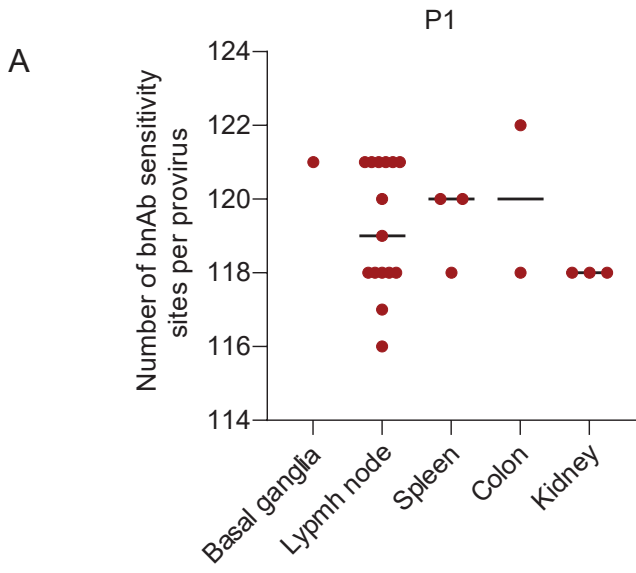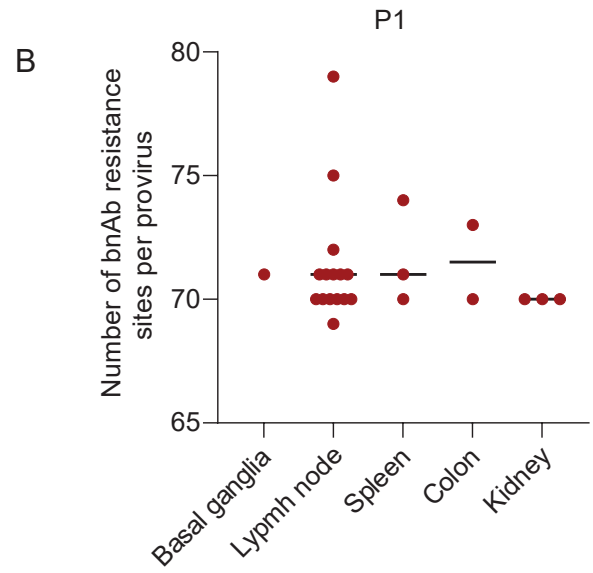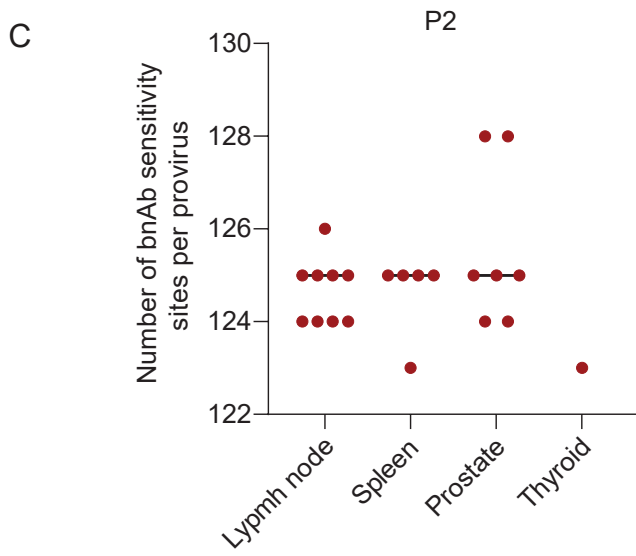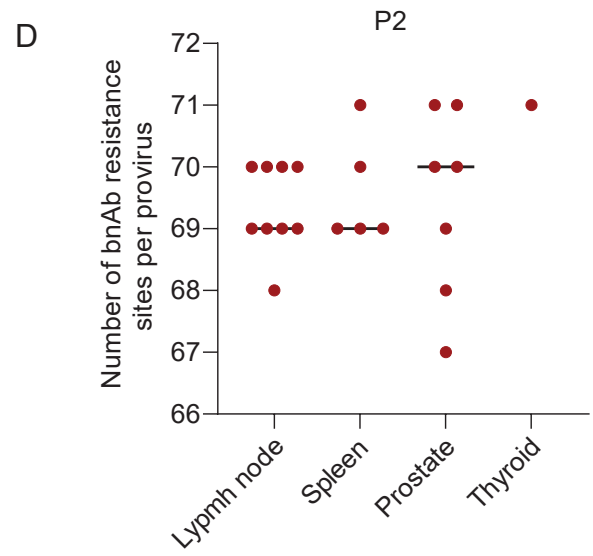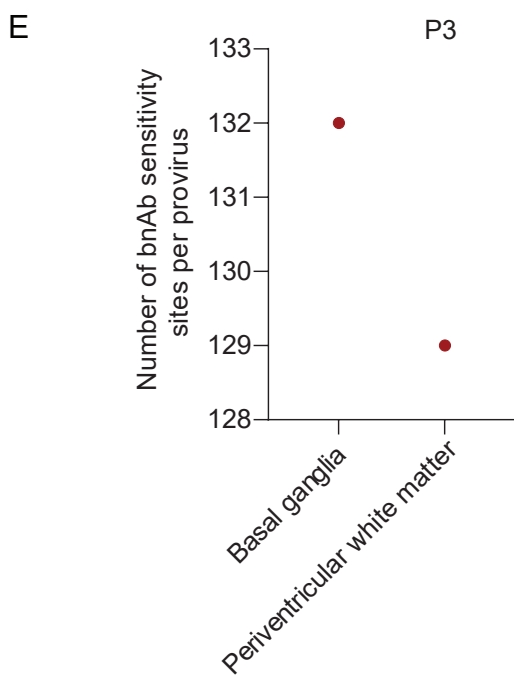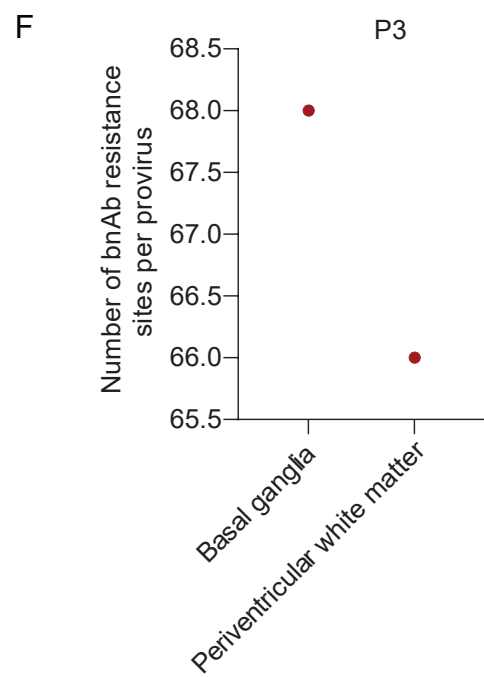

Supplement: media-1.pdf [file media-1.pdf]
